# Supplementary material
Source: Springer Nature journal article supplement (https://www.springermedizin.de/resource/supplementary/12935_2010_259_MOESM4_ESM.pdf/9540168)

**A**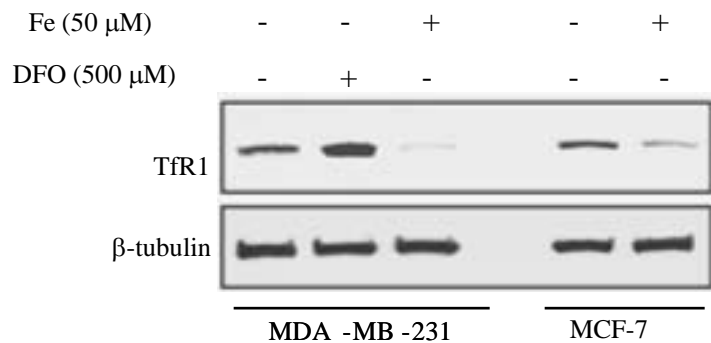**B**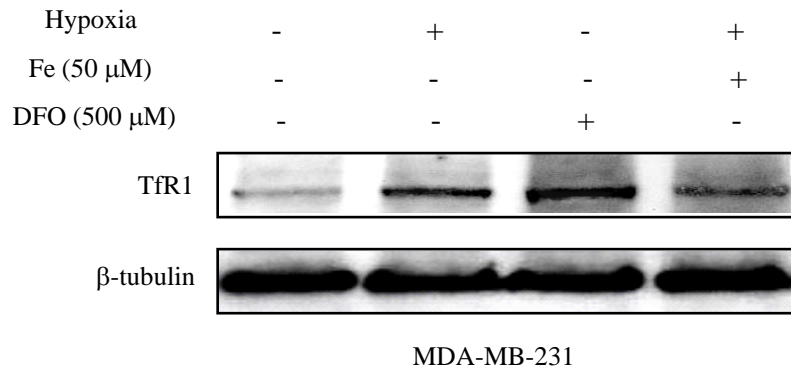**C**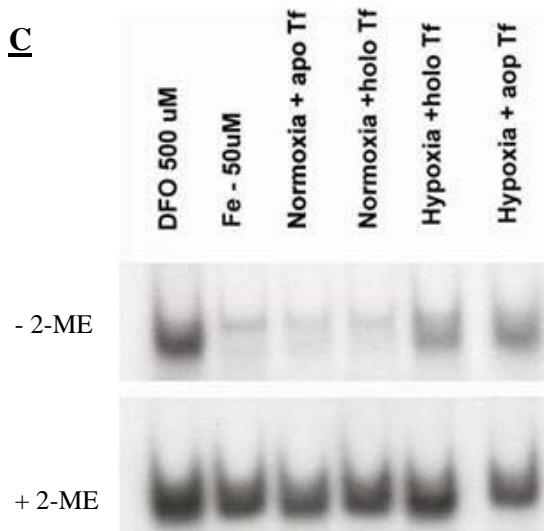**D**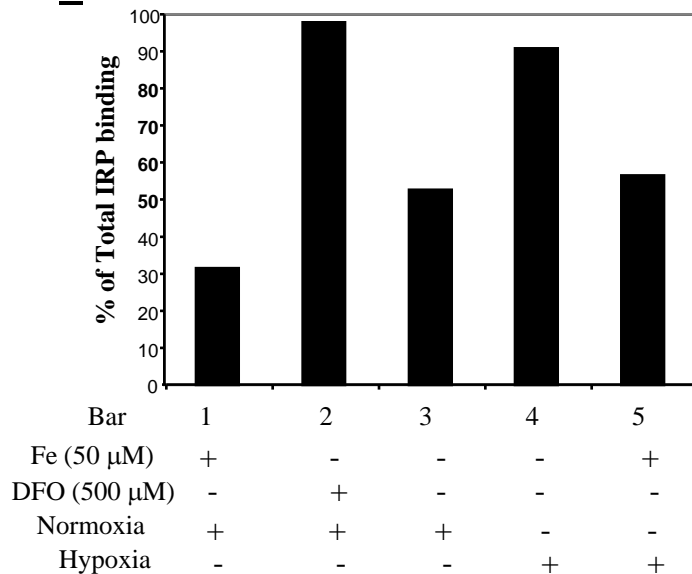

Supplement: MOESM4 [file 9540168]
